# Supplementary material for: Rutin prevents inflammation-associated colon damage via inhibiting the p38/MAPKAPK2 and PI3K/Akt/GSK3β/NF-κB signalling axes and enhancing splenic Tregs in DSS-induced murine chronic colitis
Source: Royal Society of Chemistry journal article supplement (doi:10.1039/d1fo01557e), 2021-01-01
Supplement: d1fo01557e2.pdf [file d1fo01557e2.pdf]

**Supplementary Table 2.** List of various primary anti-bodies used for western blot and IHC analysis.

| Antibody                                       |                                   | Raised in         | Molecular weight (kDa) |
|------------------------------------------------|-----------------------------------|-------------------|------------------------|
| NF- $\kappa$ B p65 (D14E12) XP                 |                                   | Rabbit monoclonal | 65                     |
| Phospho-NF- $\kappa$ B p65 (Ser 536) (93H1) XP | Cell Signalling<br>Technology, US | Rabbit monoclonal | 65                     |
| Phospho-SAPK/JNK (Thr183/Tyr185) (81E11)       |                                   | Rabbit monoclonal | 46, 54                 |
| SAPK/JNK antibody                              |                                   | Rabbit monoclonal | 46, 54                 |
| Phospho-p44/42 MAPK (ERK1/2) (Thr 202/Tyr 204) |                                   | Rabbit monoclonal | 42, 44                 |
| p44/42 MAPK (ERK1/2)                           |                                   | Rabbit monoclonal | 42, 44                 |
| p38MAPK                                        |                                   | Rabbit monoclonal | 43                     |
| Phospho-p38MAPK (Thr180/Tyr182) (D3F9) XP      |                                   | Rabbit monoclonal | 43                     |
| MAPKAPK-2 (D1E11)                              |                                   | Rabbit monoclonal | 47, 49                 |
| Phospho-MAPKAPK-2 (Thr334) (3007S)             |                                   | Rabbit monoclonal | 49                     |
| P13 Kinase p85 (19H8)                          |                                   | Rabbit monoclonal | 85                     |
| Phospho-P13 Kinase p85 (Tyr 458)/p55 (Tyr199)  |                                   | Rabbit monoclonal | 60, 85                 |
| Akt                                            |                                   | Rabbit monoclonal | 60                     |
| GSK-3 $\beta$ (27C10)                          |                                   | Rabbit monoclonal | 46                     |
| GSK-3 $\beta$ (Ser9) (D3A4)                    |                                   | Rabbit monoclonal | 46                     |
| Phospho-Akt (Ser473)                           |                                   | Rabbit monoclonal | 60                     |
| Bax (B-9) (sc-7480)                            | Santa Cruz, California,<br>USA    | Mouse monoclonal  | 23                     |
| Bcl-2 (C-2) (sc-7382)                          |                                   | Mouse monoclonal  | 26                     |
| PCNA (PC10) (sc-56)                            |                                   | Mouse monoclonal  | 30                     |
| $\beta$ -tubulin (sc-58882)                    |                                   | Mouse monoclonal  | 55                     |
