# Supplementary material for: Rutin prevents inflammation-associated colon damage via inhibiting the p38/MAPKAPK2 and PI3K/Akt/GSK3β/NF-κB signalling axes and enhancing splenic Tregs in DSS-induced murine chronic colitis
Source: Royal Society of Chemistry journal article supplement (doi:10.1039/d1fo01557e), 2021-01-01
Supplement: d1fo01557e3.pdf [file d1fo01557e3.pdf]

**Supplementary Table 3.** Scoring pattern used to measure the pathological changes in colon during colitis.

---

|                                                                                                           |   |
|-----------------------------------------------------------------------------------------------------------|---|
| Normal colonic mucosa                                                                                     | 0 |
| Loss of one-third of the crypts                                                                           | 1 |
| Loss of two-thirds of the crypt                                                                           | 2 |
| Lamina propria is covered with a single layer<br>of epithelium and mild inflammatory cell<br>infiltration | 3 |
| Erosions and marked inflammatory cell<br>infiltration                                                     | 4 |

---
